# Supplementary material for: Multifunctional Medical Grade Resin with Enhanced Mechanical and Antibacterial Properties: The Effect of Copper Nano-Inclusions in Vat Polymerization (VPP) Additive Manufacturing
Source: MDPI journal article supplement (doi:10.3390/jfb13040258), 2022-11-21
Supplement: s1 [file s1]

Supplementary material for the Article

# Multifunctional Medical Grade Resin with enhanced mechanical and antibacterial properties: The effect of Copper Nano-Inclusions in VAT polymerization Additive Manufacturing

N. Vidakis <sup>1\*</sup>, M. Petousis <sup>1</sup>, V. Papadakis <sup>2</sup>, N. Mountakis <sup>1</sup>

<sup>1</sup> Department of Mechanical Engineering, Hellenic Mediterranean University, Heraklion 71410, Greece, vidakis@hmu.gr (N.V.); markospetousis@hmu.gr (M.P.); mountakis@hmu.gr (N.M.)

<sup>2</sup> Institute of Molecular Biology and Biotechnology, Foundation for Research and Technology – Hellas, 71110 Heraklion, Greece., vassilis\_papadakis@imbb.forth.gr (V.P.)

\* Corresponding author: e-mail: vidakis@hmu.gr (N.V.), Tel.: +302810379227)

## 1. Experimental results

The complete experimental results for the control parameters' different levels are presented in tables S1 and S2.

**Table S1.** Measured Tensile Strength, Tensile Modulus of Elasticity, Tensile Toughness, Flexural Strength, Flexural Modulus of Elasticity, and Flexural Toughness for each experimental run and five replicas per run.

| A/A | %Cu (%) | Printing Angle | sB Tension (MPa) | E Tension (MPa) | Toughness Tension | sB Flexural (MPa) | E Flexural (MPa) | Toughness Flexural (MJ/m <sup>3</sup> ) |
|-----|---------|----------------|------------------|-----------------|-------------------|-------------------|------------------|-----------------------------------------|
| 1   | 0.0     | 0              | 73.71            | 194.48          | 21.28             | 98.59             | 2308.27          | 2.71                                    |
| 2   | 0.0     | 0              | 71.26            | 242.17          | 16.19             | 97.14             | 2247.49          | 2.65                                    |
| 3   | 0.0     | 0              | 71.78            | 232.20          | 21.85             | 97.47             | 2282.37          | 2.68                                    |
| 4   | 0.0     | 0              | 71.50            | 205.62          | 22.49             | 97.78             | 2274.25          | 2.67                                    |
| 5   | 0.0     | 0              | 71.27            | 235.74          | 21.84             | 98.31             | 2267.52          | 2.67                                    |
| 6   | 0.0     | 45             | 73.38            | 294.86          | 15.29             | 106.07            | 2642.36          | 3.03                                    |
| 7   | 0.0     | 45             | 74.62            | 320.78          | 14.18             | 101.21            | 2505.51          | 2.86                                    |
| 8   | 0.0     | 45             | 73.33            | 311.37          | 12.59             | 107.20            | 2682.39          | 3.05                                    |
| 9   | 0.0     | 45             | 73.25            | 304.24          | 13.57             | 103.41            | 2562.18          | 2.95                                    |
| 10  | 0.0     | 45             | 73.85            | 320.32          | 13.74             | 104.58            | 2691.97          | 2.97                                    |
| 11  | 0.0     | 90             | 69.15            | 317.60          | 8.43              | 108.66            | 2779.74          | 3.13                                    |
| 12  | 0.0     | 90             | 72.25            | 294.25          | 13.26             | 109.35            | 2797.50          | 3.15                                    |
| 13  | 0.0     | 90             | 72.71            | 330.93          | 12.04             | 104.93            | 2637.71          | 3.00                                    |
| 14  | 0.0     | 90             | 72.38            | 330.22          | 12.14             | 108.33            | 2765.07          | 3.13                                    |
| 15  | 0.0     | 90             | 70.96            | 322.63          | 8.98              | 109.01            | 2753.75          | 3.11                                    |
| 16  | 0.5     | 0              | 81.70            | 341.88          | 17.05             | 108.21            | 2561.64          | 3.03                                    |
| 17  | 0.5     | 0              | 77.23            | 311.29          | 14.51             | 111.52            | 2640.81          | 3.11                                    |
| 18  | 0.5     | 0              | 78.11            | 312.32          | 14.00             | 108.77            | 2552.40          | 3.03                                    |

|         |     |    |       |        |       |        |         |      |
|---------|-----|----|-------|--------|-------|--------|---------|------|
| 19      | 0.5 | 0  | 76.82 | 333.86 | 14.17 | 110.52 | 2548.86 | 3.03 |
| 20      | 0.5 | 0  | 79.30 | 304.87 | 15.13 | 108.08 | 2565.40 | 3.06 |
| 21      | 0.5 | 45 | 81.08 | 336.08 | 16.97 | 109.98 | 2730.28 | 3.15 |
| 22      | 0.5 | 45 | 79.86 | 342.05 | 13.69 | 114.25 | 2826.24 | 3.27 |
| 23      | 0.5 | 45 | 81.80 | 361.07 | 16.56 | 116.05 | 2877.97 | 3.32 |
| 24      | 0.5 | 45 | 80.67 | 356.43 | 14.48 | 115.20 | 2748.97 | 3.32 |
| 25      | 0.5 | 45 | 81.40 | 334.33 | 15.97 | 111.96 | 2872.42 | 3.22 |
| 26      | 0.5 | 90 | 82.32 | 366.04 | 16.94 | 118.73 | 2994.90 | 3.44 |
| 27      | 0.5 | 90 | 82.39 | 342.41 | 15.45 | 112.30 | 2825.93 | 3.25 |
| 28      | 0.5 | 90 | 82.84 | 346.34 | 18.23 | 117.40 | 2987.58 | 3.40 |
| 29      | 0.5 | 90 | 82.36 | 355.15 | 15.78 | 114.53 | 2884.08 | 3.46 |
| 30      | 0.5 | 90 | 82.76 | 340.96 | 17.02 | 113.87 | 2865.55 | 3.45 |
| 31      | 1.0 | 0  | 76.34 | 317.43 | 15.99 | 102.05 | 2370.41 | 2.82 |
| 32      | 1.0 | 0  | 78.07 | 282.18 | 16.27 | 100.39 | 2322.19 | 2.77 |
| 33      | 1.0 | 0  | 79.32 | 304.43 | 15.56 | 102.17 | 2380.58 | 2.83 |
| 34      | 1.0 | 0  | 78.80 | 287.05 | 15.58 | 100.99 | 2343.17 | 2.80 |
| 35      | 1.0 | 0  | 78.49 | 297.70 | 15.80 | 100.73 | 2338.01 | 2.83 |
| 36      | 1.0 | 45 | 75.19 | 341.44 | 8.98  | 110.21 | 2695.02 | 3.15 |
| 37      | 1.0 | 45 | 79.03 | 320.40 | 21.40 | 106.22 | 2628.71 | 3.04 |
| 38      | 1.0 | 45 | 71.81 | 329.24 | 9.00  | 111.82 | 2772.77 | 3.20 |
| 39      | 1.0 | 45 | 74.51 | 327.75 | 20.96 | 111.28 | 2688.51 | 3.17 |
| 40      | 1.0 | 45 | 77.13 | 335.48 | 17.46 | 107.15 | 2768.08 | 3.15 |
| 41      | 1.0 | 90 | 79.32 | 342.01 | 12.87 | 112.47 | 2796.76 | 3.22 |
| 42      | 1.0 | 90 | 79.97 | 340.48 | 17.07 | 114.15 | 2861.32 | 3.28 |
| 43      | 1.0 | 90 | 80.67 | 346.04 | 16.42 | 115.14 | 2993.17 | 3.37 |
| 44      | 1.0 | 90 | 79.64 | 341.61 | 13.65 | 114.95 | 2929.09 | 3.28 |
| 45      | 1.0 | 90 | 80.58 | 345.69 | 14.86 | 113.43 | 2879.98 | 3.35 |
| Min     |     |    | 69.15 | 194.48 | 8.43  | 97.14  | 2247.49 | 2.65 |
| Max     |     |    | 82.84 | 366.04 | 22.49 | 118.73 | 2994.90 | 3.46 |
| Average |     |    | 77.00 | 315.59 | 15.46 | 108.15 | 2654.42 | 3.08 |

**Table S2.** Measured Tensile Specimen Area, Tensile Specimen Area to Nominal Area, Horizontal and Vertical Ra and Rz Roughness for each experimental run and five replicas per run.

| A/A | %Cu (%) | Printing<br>Angle (deg.) | Area<br>Tension | Area to Nom<br>[%] | Ra-Hor.<br>(μm) | Rz-Hor.<br>(μm) | Ra-Ver.<br>(μm) | Rz-Ver.<br>(μm) |
|-----|---------|--------------------------|-----------------|--------------------|-----------------|-----------------|-----------------|-----------------|
| 1   | 0.0     | 0                        | 10.31           | 101.27             | 1.18            | 7.8             | 1.78            | 11.1            |
| 2   | 0.0     | 0                        | 10.28           | 100.97             | 1.24            | 8.1             | 2.30            | 15.6            |
| 3   | 0.0     | 0                        | 10.18           | 100.05             | 1.34            | 9.4             | 1.46            | 9.0             |

---

|    |     |    |       |        |       |      |      |      |
|----|-----|----|-------|--------|-------|------|------|------|
| 4  | 0.0 | 0  | 10.24 | 100.68 | 1.33  | 8.3  | 1.63 | 13.8 |
| 5  | 0.0 | 0  | 10.24 | 100.68 | 1.28  | 8.7  | 1.68 | 14.9 |
| 6  | 0.0 | 45 | 9.77  | 95.96  | 1.48  | 9.2  | 2.02 | 12.2 |
| 7  | 0.0 | 45 | 9.92  | 97.50  | 1.54  | 9.7  | 2.16 | 13.8 |
| 8  | 0.0 | 45 | 10.01 | 98.41  | 1.46  | 10.2 | 1.74 | 11.4 |
| 9  | 0.0 | 45 | 9.83  | 96.58  | 1.52  | 10.0 | 2.18 | 13.6 |
| 10 | 0.0 | 45 | 9.92  | 97.50  | 1.46  | 10.0 | 2.08 | 11.5 |
| 11 | 0.0 | 90 | 9.86  | 96.89  | 1.18  | 7.3  | 1.82 | 11.3 |
| 12 | 0.0 | 90 | 9.86  | 96.89  | 0.98  | 6.9  | 1.78 | 11.7 |
| 13 | 0.0 | 90 | 9.80  | 96.27  | 1.50  | 9.0  | 1.98 | 11.2 |
| 14 | 0.0 | 90 | 9.86  | 96.89  | 0.99  | 8.6  | 1.86 | 11.4 |
| 15 | 0.0 | 90 | 9.83  | 96.58  | 1.15  | 8.2  | 1.84 | 11.5 |
| 16 | 0.5 | 0  | 9.94  | 97.67  | 9.70  | 63.0 | 5.80 | 29.0 |
| 17 | 0.5 | 0  | 9.97  | 98.01  | 11.00 | 33.0 | 4.60 | 27.0 |
| 18 | 0.5 | 0  | 9.69  | 95.22  | 11.00 | 65.0 | 4.00 | 25.0 |
| 19 | 0.5 | 0  | 9.91  | 97.39  | 10.90 | 40.0 | 5.70 | 30.0 |
| 20 | 0.5 | 0  | 9.82  | 96.45  | 10.20 | 60.0 | 4.30 | 30.0 |
| 21 | 0.5 | 45 | 9.36  | 92.01  | 5.00  | 31.0 | 5.60 | 23.0 |
| 22 | 0.5 | 45 | 9.36  | 92.01  | 5.80  | 36.0 | 4.40 | 28.0 |
| 23 | 0.5 | 45 | 9.21  | 90.52  | 5.00  | 26.0 | 6.60 | 36.0 |
| 24 | 0.5 | 45 | 9.27  | 91.12  | 5.70  | 30.0 | 5.40 | 20.0 |
| 25 | 0.5 | 45 | 9.39  | 92.31  | 5.60  | 30.0 | 4.40 | 20.0 |
| 26 | 0.5 | 90 | 9.39  | 92.32  | 2.60  | 17.0 | 4.20 | 21.0 |
| 27 | 0.5 | 90 | 9.39  | 92.32  | 3.40  | 19.0 | 4.40 | 28.0 |
| 28 | 0.5 | 90 | 9.21  | 90.52  | 2.60  | 20.0 | 5.00 | 30.0 |
| 29 | 0.5 | 90 | 9.30  | 91.42  | 2.80  | 20.0 | 6.40 | 30.0 |
| 30 | 0.5 | 90 | 9.39  | 92.32  | 3.20  | 20.0 | 6.50 | 28.0 |
| 31 | 1.0 | 0  | 9.39  | 92.26  | 5.30  | 53.0 | 8.20 | 33.0 |
| 32 | 1.0 | 0  | 9.60  | 94.30  | 5.00  | 26.0 | 6.80 | 39.0 |
| 33 | 1.0 | 0  | 9.45  | 92.83  | 5.60  | 31.0 | 6.20 | 33.0 |
| 34 | 1.0 | 0  | 9.57  | 94.00  | 4.90  | 30.0 | 7.10 | 30.0 |
| 35 | 1.0 | 0  | 9.42  | 92.54  | 5.90  | 20.0 | 7.90 | 30.0 |
| 36 | 1.0 | 45 | 9.21  | 90.52  | 3.40  | 20.0 | 3.60 | 22.0 |
| 37 | 1.0 | 45 | 9.18  | 90.22  | 2.00  | 14.0 | 5.40 | 36.0 |
| 38 | 1.0 | 45 | 9.24  | 90.82  | 3.00  | 20.0 | 5.00 | 28.0 |
| 39 | 1.0 | 45 | 9.21  | 90.52  | 3.40  | 20.0 | 4.40 | 30.0 |
| 40 | 1.0 | 45 | 9.27  | 91.12  | 3.10  | 20.0 | 5.20 | 30.0 |
| 41 | 1.0 | 90 | 9.33  | 91.72  | 1.24  | 9.1  | 3.60 | 15.0 |
| 42 | 1.0 | 90 | 9.24  | 90.82  | 1.36  | 6.6  | 2.80 | 20.0 |
| 43 | 1.0 | 90 | 9.33  | 91.72  | 1.68  | 11.9 | 2.00 | 11.0 |
| 44 | 1.0 | 90 | 9.30  | 91.42  | 1.61  | 10.8 | 2.80 | 10.0 |
| 45 | 1.0 | 90 | 9.33  | 91.72  | 1.26  | 10.3 | 2.40 | 20.0 |

---

|         |       |        |       |      |      |      |
|---------|-------|--------|-------|------|------|------|
| Min     | 9.18  | 90.22  | 0.98  | 6.6  | 1.46 | 9.0  |
| Max     | 10.31 | 101.27 | 11.00 | 65.0 | 8.20 | 39.0 |
| Average | 9.61  | 94.47  | 3.62  | 21.0 | 3.98 | 21.7 |

## 2. ANOVA analysis tables

The following tables present the ANOVA analysis for the response vs. the control parameters.

**Table S3.** Polynomial ANOVA, Tensile Strength vs %Cu, PA.

| Source                | DF     | Adj SS  | Adj MS  | F-Value | P-Value |
|-----------------------|--------|---------|---------|---------|---------|
| Regression            | 5      | 573.872 | 114.774 | 31.96   | 0.000   |
| %Cu                   | 1      | 369.069 | 369.069 | 102.78  | 0.000   |
| PA                    | 1      | 0.497   | 0.497   | 0.14    | 0.712   |
| %Cu <sup>2</sup>      | 1      | 310.023 | 310.023 | 86.34   | 0.000   |
| PA <sup>2</sup>       | 1      | 1.659   | 1.659   | 0.46    | 0.501   |
| %Cu × PA              | 1      | 6.327   | 6.327   | 1.76    | 0.192   |
| Error                 | 39     | 140.046 | 3.591   |         |         |
| Total                 | 44     | 713.918 | 118.365 |         |         |
| R <sup>2</sup>        | 80.38% |         |         |         |         |
| R <sup>2</sup> (adj)  | 77.87% |         |         |         |         |
| R <sup>2</sup> (pred) | 74.24% |         |         |         |         |

**Table S4.** Polynomial ANOVA, Tensile Modulus of Elasticity vs %Cu, PA.

| Source                | DF     | Adj SS | Adj MS  | F-Value | P-Value |
|-----------------------|--------|--------|---------|---------|---------|
| Regression            | 5      | 56424  | 11284.7 | 39.78   | 0.000   |
| %Cu                   | 1      | 22046  | 22045.6 | 77.71   | 0.000   |
| PA                    | 1      | 13899  | 13899.3 | 48.99   | 0.000   |
| %Cu <sup>2</sup>      | 1      | 12340  | 12339.9 | 43.50   | 0.000   |
| PA <sup>2</sup>       | 1      | 4082   | 4082.1  | 14.39   | 0.001   |
| %Cu × PA              | 1      | 3337   | 3337.3  | 11.76   | 0.001   |
| Error                 | 39     | 11064  | 283.7   |         |         |
| Total                 | 44     | 67488  | 11568.4 |         |         |
| R <sup>2</sup>        | 83.61% |        |         |         |         |
| R <sup>2</sup> (adj)  | 81.50% |        |         |         |         |
| R <sup>2</sup> (pred) | 78.11% |        |         |         |         |

**Table S5.** Polynomial ANOVA, Tensile Toughness vs %Cu, PA.

| Source     | DF | Adj SS  | Adj MS | F-Value | P-Value |
|------------|----|---------|--------|---------|---------|
| Regression | 5  | 172.317 | 34.463 | 4.14    | 0.004   |
| %Cu        | 1  | 3.380   | 3.380  | 0.41    | 0.528   |

|                       |        |         |        |       |       |
|-----------------------|--------|---------|--------|-------|-------|
| PA                    | 1      | 54.246  | 54.246 | 6.52  | 0.015 |
| %Cu <sup>2</sup>      | 1      | 1.651   | 1.651  | 0.20  | 0.658 |
| PA <sup>2</sup>       | 1      | 4.974   | 4.974  | 0.60  | 0.444 |
| %Cu × PA              | 1      | 98.933  | 98.933 | 11.89 | 0.001 |
| Error                 | 39     | 324.426 | 8.319  |       |       |
| Total                 | 44     | 496.743 | 42.782 |       |       |
| R <sup>2</sup>        | 34.69% |         |        |       |       |
| R <sup>2</sup> (adj)  | 26.32% |         |        |       |       |
| R <sup>2</sup> (pred) | 14.60% |         |        |       |       |

**Table S6.** Polynomial ANOVA, Flexural Strength vs %Cu, PA.

| Source                | DF     | Adj SS  | Adj MS  | F-Value | P-Value |
|-----------------------|--------|---------|---------|---------|---------|
| Regression            | 5      | 1372.42 | 274.484 | 58.81   | 0.000   |
| %Cu                   | 1      | 501.27  | 501.267 | 107.40  | 0.000   |
| PA                    | 1      | 103.00  | 103.001 | 22.07   | 0.000   |
| %Cu <sup>2</sup>      | 1      | 478.61  | 478.605 | 102.54  | 0.000   |
| PA <sup>2</sup>       | 1      | 20.72   | 20.715  | 4.44    | 0.042   |
| %Cu × PA              | 1      | 8.21    | 8.212   | 1.76    | 0.192   |
| Error                 | 39     | 182.03  | 4.667   |         |         |
| Total                 | 44     | 1554.45 | 279.151 |         |         |
| R <sup>2</sup>        | 88.29% |         |         |         |         |
| R <sup>2</sup> (adj)  | 86.79% |         |         |         |         |
| R <sup>2</sup> (pred) | 84.79% |         |         |         |         |

**Table S7.** Polynomial ANOVA, Flexural Modulus of Elasticity vs %Cu, PA.

| Source                | DF     | Adj SS  | Adj MS | F-Value | P-Value |
|-----------------------|--------|---------|--------|---------|---------|
| Regression            | 5      | 1961254 | 392251 | 85.18   | 0.000   |
| %Cu                   | 1      | 280289  | 280289 | 60.87   | 0.000   |
| PA                    | 1      | 303135  | 303135 | 65.83   | 0.000   |
| %Cu <sup>2</sup>      | 1      | 277802  | 277802 | 60.33   | 0.000   |
| PA <sup>2</sup>       | 1      | 76929   | 76929  | 16.71   | 0.000   |
| %Cu × PA              | 1      | 6198    | 6198   | 1.35    | 0.253   |
| Error                 | 39     | 179586  | 4605   |         |         |
| Total                 | 44     | 2140840 | 396856 |         |         |
| R <sup>2</sup>        | 91.61% |         |        |         |         |
| R <sup>2</sup> (adj)  | 90.54% |         |        |         |         |
| R <sup>2</sup> (pred) | 88.96% |         |        |         |         |

**Table S8.** Polynomial ANOVA, Flexural Toughness vs %Cu, PA.

| Source                | DF     | Adj SS  | Adj MS   | F-Value | P-Value |
|-----------------------|--------|---------|----------|---------|---------|
| Regression            | 5      | 2.14491 | 0.428982 | 107.40  | 0.000   |
| %Cu                   | 1      | 0.59972 | 0.599721 | 150.14  | 0.000   |
| PA                    | 1      | 0.22027 | 0.220266 | 55.14   | 0.000   |
| %Cu <sup>2</sup>      | 1      | 0.55425 | 0.554255 | 138.76  | 0.000   |
| PA <sup>2</sup>       | 1      | 0.04323 | 0.043227 | 10.82   | 0.002   |
| %Cu × PA              | 1      | 0.00512 | 0.005119 | 1.28    | 0.265   |
| Error                 | 39     | 0.15578 | 0.003994 |         |         |
| Total                 | 44     | 2.30069 | 0.432976 |         |         |
| R <sup>2</sup>        | 93.23% |         |          |         |         |
| R <sup>2</sup> (adj)  | 92.36% |         |          |         |         |
| R <sup>2</sup> (pred) | 91.16% |         |          |         |         |

**Table S9.** Polynomial ANOVA, Measured area of Specimen, PA.

| Source                | DF     | Adj SS  | Adj MS   | F-Value | P-Value |
|-----------------------|--------|---------|----------|---------|---------|
| Regression            | 5      | 2.14491 | 0.428982 | 107.40  | 0.000   |
| %Cu                   | 1      | 0.59972 | 0.599721 | 150.14  | 0.000   |
| PA                    | 1      | 0.22027 | 0.220266 | 55.14   | 0.000   |
| %Cu <sup>2</sup>      | 1      | 0.55425 | 0.554255 | 138.76  | 0.000   |
| PA <sup>2</sup>       | 1      | 0.04323 | 0.043227 | 10.82   | 0.002   |
| %Cu × PA              | 1      | 0.00512 | 0.005119 | 1.28    | 0.265   |
| Error                 | 39     | 0.15578 | 0.003994 |         |         |
| Total                 | 44     | 2.30069 | 0.432976 |         |         |
| R <sup>2</sup>        | 93.97% |         |          |         |         |
| R <sup>2</sup> (adj)  | 93.20% |         |          |         |         |
| R <sup>2</sup> (pred) | 92.12% |         |          |         |         |

**Table S10.** Polynomial ANOVA, Measured Area to Nominal vs %Cu, PA.

| Source               | DF     | Adj SS  | Adj MS  | F-Value | P-Value |
|----------------------|--------|---------|---------|---------|---------|
| Regression           | 5      | 480.815 | 96.1630 | 121.59  | 0.000   |
| %Cu                  | 1      | 98.358  | 98.3583 | 124.37  | 0.000   |
| PA                   | 1      | 84.430  | 84.4300 | 106.76  | 0.000   |
| %Cu <sup>2</sup>     | 1      | 23.956  | 23.9556 | 30.29   | 0.000   |
| PA <sup>2</sup>      | 1      | 39.835  | 39.8351 | 50.37   | 0.000   |
| %Cu × PA             | 1      | 6.696   | 6.6959  | 8.47    | 0.006   |
| Error                | 39     | 30.843  | 0.7909  |         |         |
| Total                | 44     | 511.658 | 96.9539 |         |         |
| R <sup>2</sup>       | 93.97% |         |         |         |         |
| R <sup>2</sup> (adj) | 93.20% |         |         |         |         |

---

|                       |        |
|-----------------------|--------|
| R <sup>2</sup> (pred) | 92.12% |
|-----------------------|--------|

---

**Table S11.** Polynomial ANOVA, Ra Roughness - Horizontal vs %Cu, PA.

| Source                | DF     | Adj SS  | Adj MS  | F-Value | P-Value |
|-----------------------|--------|---------|---------|---------|---------|
| Regression            | 5      | 323.646 | 64.729  | 40.75   | 0.000   |
| %Cu                   | 1      | 205.286 | 205.286 | 129.23  | 0.000   |
| PA                    | 1      | 7.962   | 7.962   | 5.01    | 0.031   |
| %Cu <sup>2</sup>      | 1      | 161.658 | 161.658 | 101.76  | 0.000   |
| PA <sup>2</sup>       | 1      | 2.336   | 2.336   | 1.47    | 0.233   |
| %Cu × PA              | 1      | 18.012  | 18.012  | 11.34   | 0.002   |
| Error                 | 39     | 61.954  | 1.589   |         |         |
| Total                 | 44     | 385.600 | 66.318  |         |         |
| R <sup>2</sup>        | 83.93% |         |         |         |         |
| R <sup>2</sup> (adj)  | 81.87% |         |         |         |         |
| R <sup>2</sup> (pred) | 78.89% |         |         |         |         |

---

**Table S12.** Polynomial ANOVA, Rz Roughness - Horizontal vs %Cu, PA.

| Source                | DF     | Adj SS   | Adj MS  | F-Value | P-Value |
|-----------------------|--------|----------|---------|---------|---------|
| Regression            | 5      | 8008.24  | 1601.65 | 25.51   | 0.000   |
| %Cu                   | 1      | 5218.03  | 5218.03 | 83.11   | 0.000   |
| PA                    | 1      | 118.14   | 118.14  | 1.88    | 0.178   |
| %Cu <sup>2</sup>      | 1      | 3814.21  | 3814.21 | 60.75   | 0.000   |
| PA <sup>2</sup>       | 1      | 34.60    | 34.60   | 0.55    | 0.462   |
| %Cu × PA              | 1      | 594.05   | 594.05  | 9.46    | 0.004   |
| Error                 | 39     | 2448.51  | 62.78   |         |         |
| Total                 | 44     | 10456.75 | 1664.43 |         |         |
| R <sup>2</sup>        | 76.58% |          |         |         |         |
| R <sup>2</sup> (adj)  | 73.58% |          |         |         |         |
| R <sup>2</sup> (pred) | 69.00% |          |         |         |         |

---

**Table S13.** Polynomial ANOVA, Ra Roughness - Vertical vs %Cu, PA.

| Source           | DF | Adj SS  | Adj MS  | F-Value | P-Value |
|------------------|----|---------|---------|---------|---------|
| Regression       | 5  | 138.824 | 27.7648 | 36.47   | 0.000   |
| %Cu              | 1  | 79.032  | 79.0315 | 103.81  | 0.000   |
| PA               | 1  | 0.707   | 0.7068  | 0.93    | 0.341   |
| %Cu <sup>2</sup> | 1  | 31.082  | 31.0817 | 40.82   | 0.000   |
| PA <sup>2</sup>  | 1  | 0.026   | 0.0260  | 0.03    | 0.854   |
| %Cu × PA         | 1  | 26.519  | 26.5190 | 34.83   | 0.000   |
| Error            | 39 | 29.692  | 0.7613  |         |         |
| Total            | 44 | 168.516 | 28.5261 |         |         |

---

|                       |        |
|-----------------------|--------|
| R <sup>2</sup>        | 82.38% |
| R <sup>2</sup> (adj)  | 80.12% |
| R <sup>2</sup> (pred) | 76.92% |

**Table S14.** Polynomial ANOVA, Rz Roughness - Vertical vs %Cu, PA.

| Source                | DF     | Adj SS  | Adj MS  | F-Value | P-Value |
|-----------------------|--------|---------|---------|---------|---------|
| Regression            | 5      | 2687.73 | 537.55  | 27.42   | 0.000   |
| %Cu                   | 1      | 1484.35 | 1484.35 | 75.71   | 0.000   |
| PA                    | 1      | 15.93   | 15.93   | 0.81    | 0.373   |
| %Cu <sup>2</sup>      | 1      | 634.68  | 634.68  | 32.37   | 0.000   |
| PA <sup>2</sup>       | 1      | 10.34   | 10.34   | 0.53    | 0.472   |
| %Cu × PA              | 1      | 333.74  | 333.74  | 17.02   | 0.000   |
| Error                 | 39     | 764.62  | 19.61   |         |         |
| Total                 | 44     | 3452.35 | 557.16  |         |         |
| R <sup>2</sup>        | 77.85% |         |         |         |         |
| R <sup>2</sup> (adj)  | 75.01% |         |         |         |         |
| R <sup>2</sup> (pred) | 70.90% |         |         |         |         |

### 3. Pareto charts for the response vs the control parameters

The following figures present the Pareto charts for the response vs. the control parameters and a comparison between the experimental and the calculated with the produced model values.

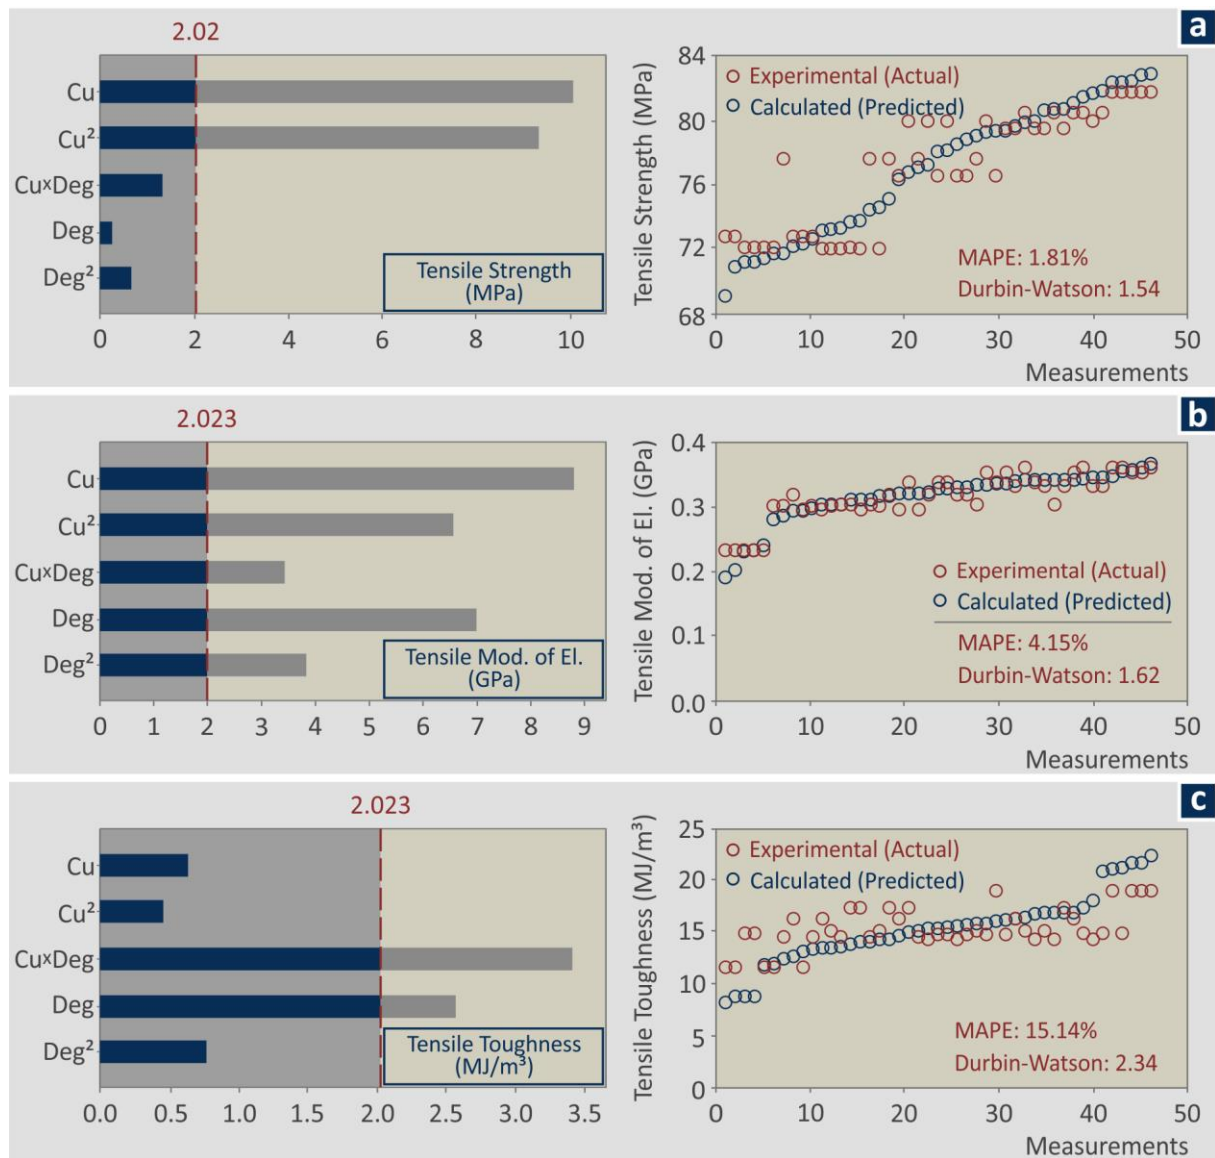

**Figure S1.** Pareto chart and experimental vs. calculated (predicted) graph, for (a) tensile strength (MPa), (b) tensile modulus of elasticity (GPa), (c) tensile toughness (MJ/m<sup>3</sup>)

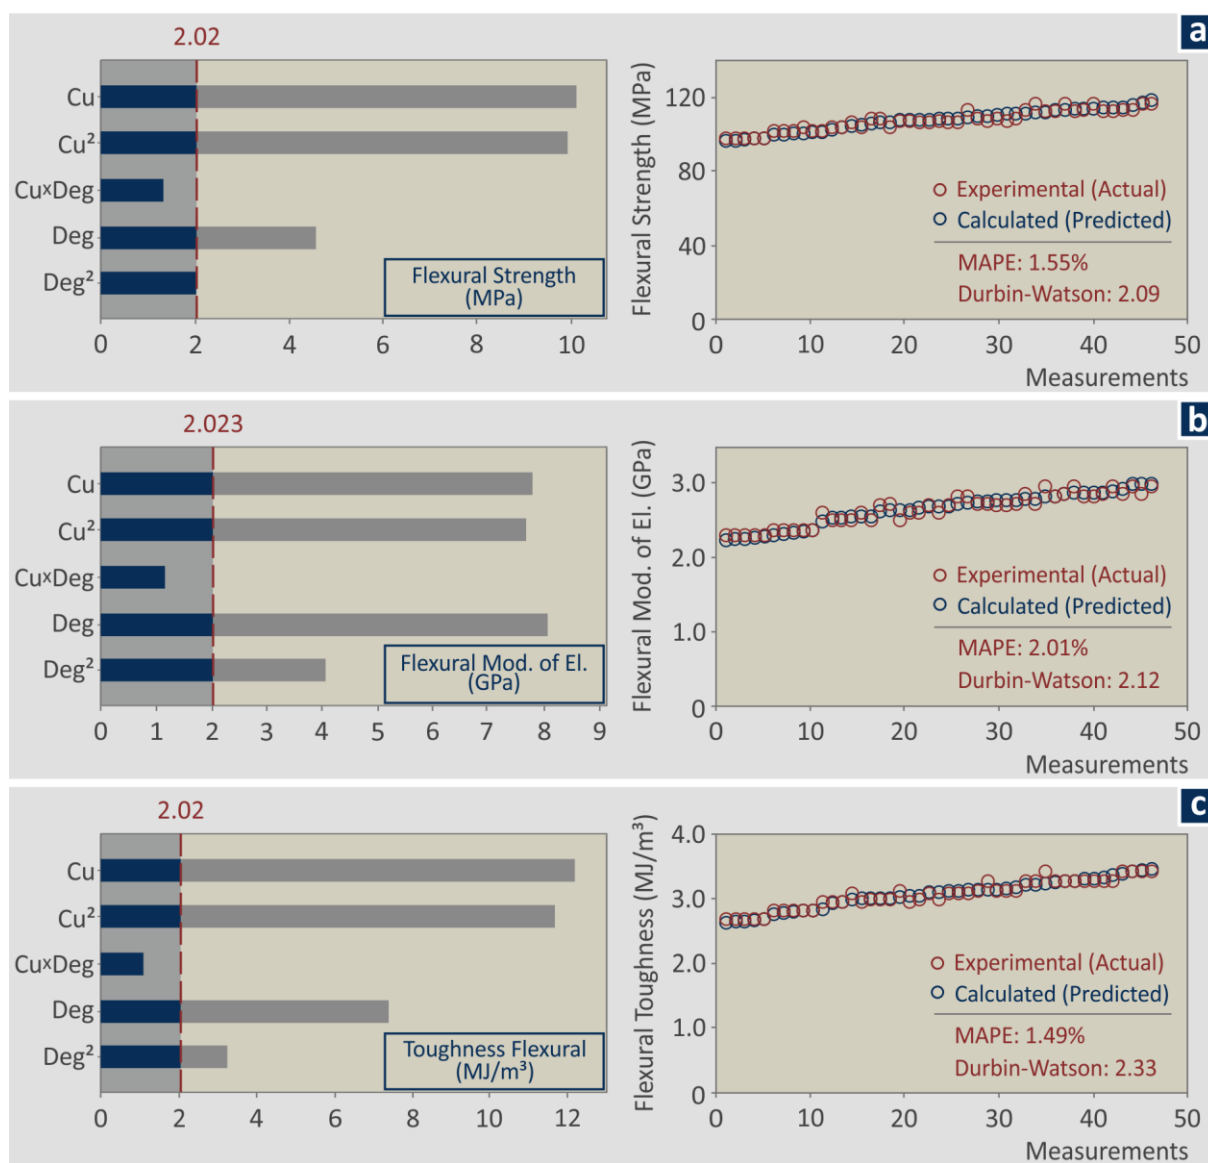

**Figure S2.** Pareto chart and experimental vs. calculated (predicted) graph, for (a) flexural strength (MPa), (b) flexural modulus of elasticity (GPa), (c) flexural toughness (MJ/m<sup>3</sup>)

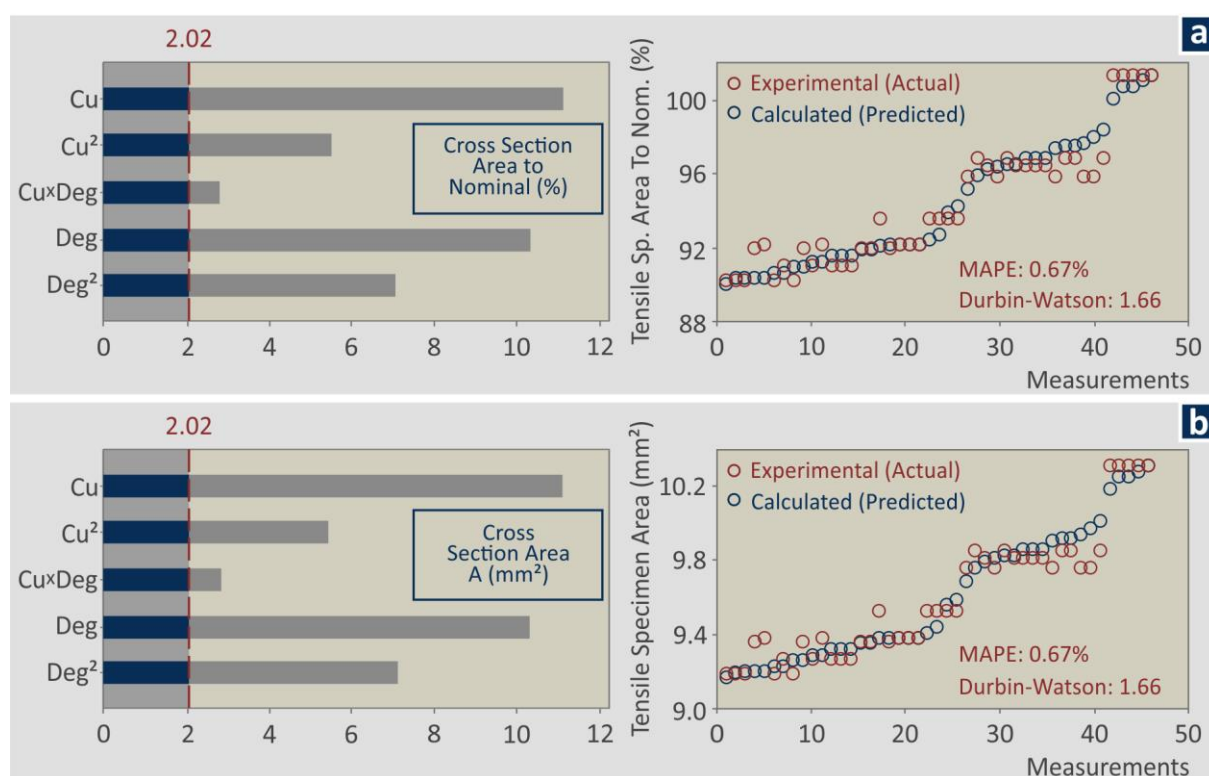

**Figure S3.** Pareto chart and experimental vs calculated (predicted) graph, for (a) cross-section area to nominal (%), (b) cross-section area (mm<sup>2</sup>)

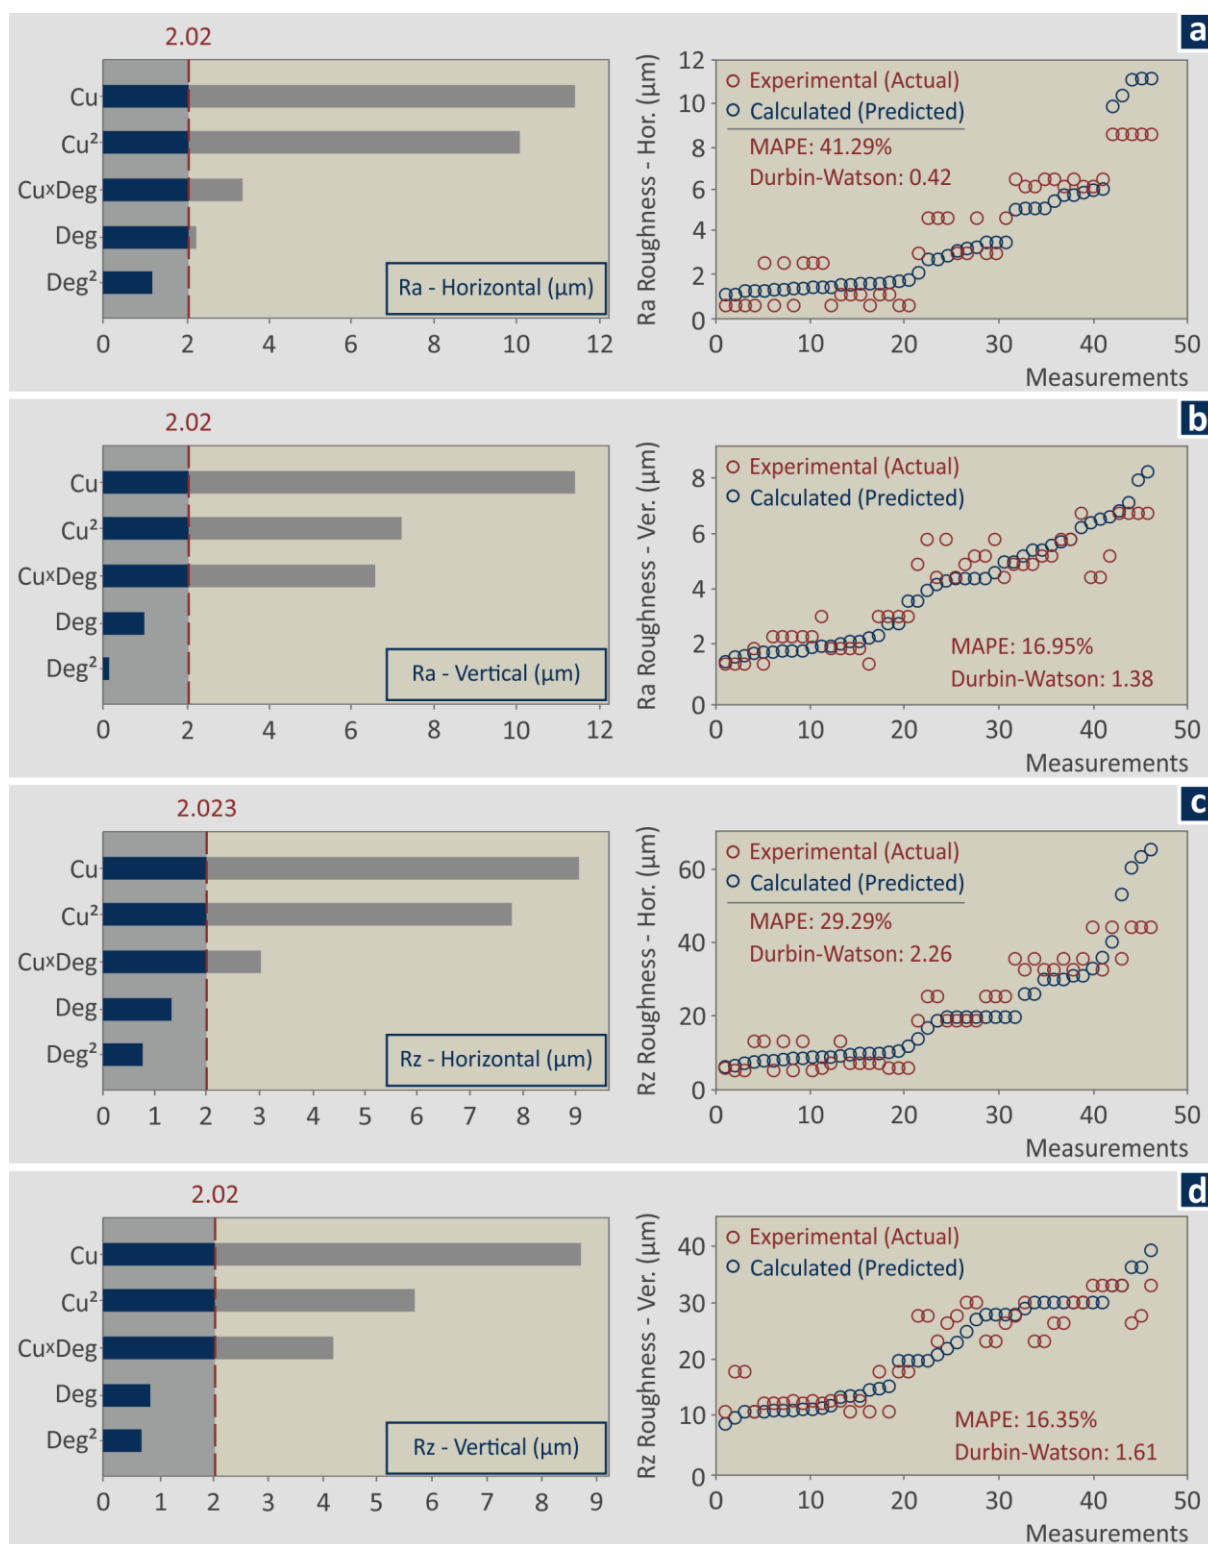

**Figure S4.** Pareto chart and experimental vs. calculated (predicted) graph, for (a) surface roughness Ra in the horizontal direction ( $\mu\text{m}$ ) (b) surface roughness Ra in the vertical direction ( $\mu\text{m}$ ), (c) surface roughness Rz in the horizontal direction ( $\mu\text{m}$ ) (d) surface roughness Rz in the vertical direction ( $\mu\text{m}$ ).
